# Supplementary material
Source: Springer Nature journal article supplement (https://www.springermedizin.de/resource/supplementary/13002_2006_45_MOESM1_ESM.pdf/9627044)

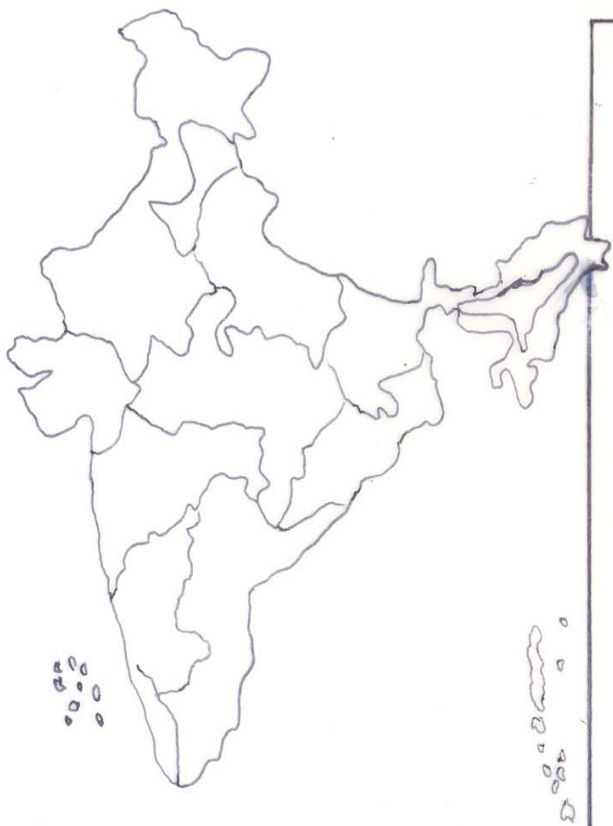

**KARBI ANGLONG**

**NAGAON**

**KARBI ANGLONG**

**M  
E  
G  
H  
A  
L  
A  
Y  
A**

**N  
A  
G  
A  
L  
A  
N  
D**

**M  
A  
N  
I  
P  
U  
R**

**CACHAR**

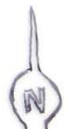

**\* STUDY SITES**

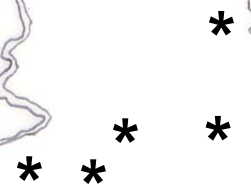

Supplement: MOESM1 [file 9627044]
